# Supplementary material for: Data sharing and data governance in sub-Saharan Africa: Perspectives from researchers and scientists engaged in data-intensive research
Source: PubMed Central journal article supplement (PMC11526389; doi:10.17159/sajs.2023/15129), 2023-05-30
Supplement: NIHMS1997167-supplement-Survey_Template.pdf [file NIHMS1997167-supplement-Survey_Template.pdf]

**SUPPLEMENTARY MATERIAL TO:** [Kabanda et al. S Afr J Sci. 2023;119\(5/6\), Art. #15129](#)

**HOW TO CITE:**

Kabanda SM, Cengiz N, Rajaratnam K, Watson BW, Brown Q, Esterhuizen TM, et al. Data sharing and data governance in sub-Saharan Africa: Perspectives from researchers and scientists engaged in data-intensive research [supplementary material]. S Afr J Sci. 2023;119(5/6), Art. #15129. <https://doi.org/10.17159/sajs.2023/15129/suppl>

---

1 Please select the country that you currently work in or have worked in for most of your employment years.

- Angola
- Benin
- Botswana
- Burkina Faso
- Burundi
- Cabo Verde
- Cameroon
- Central African Republic
- Chad
- Comoros
- Côte d'Ivoire
- Democratic Republic of the Congo
- Djibouti
- Equatorial Guinea
- Eritrea
- eSwatini
- Ethiopia
- Gabon
- Gambia
- Ghana
- Guinea
- Guinea-Bissau
- Kenya
- Lesotho
- Liberia
- Madagascar
- Malawi
- Mali
- Mauritania
- Mauritius
- Mozambique
- Namibia
- Niger
- Nigeria
- Republic of the Congo
- Rwanda
- Sao Tome and Principe
- Senegal
- Seychelles
- Sierra Leone
- Somalia
- South Africa
- South Sudan
- Sudan
- Tanzania
- Togo
- Uganda
- Zambia
- Zimbabwe

---

Please indicate your job title.

- Business Analyst (Project Manager; Product Manager; Program Manager)
- Data Scientist (Data Engineer; Data Analyst; Data Consultant)
- Developer (Software Engineer; Java Developer; Hadoop Developer; Software Developer)
- Engineer (Data Architect; DevOps Engineer; Solution Architect; Systems Engineer)
- Researcher
- Other

---

If you selected other, please specify.

---

---

Please indicate your age category.

- 18-29
- 30-39
- 40-49
- >50

---

2 Please specify your gender.

- Female
- Male
- Other

---

What is the highest level of post-school education you have completed?

- Trade/ technical/ vocational training
- Bachelors degree
- Honours degree
- Masters degree
- Doctorate degree
- Other

---

4 If you selected other, please specify.

---

---

Which one of the following best describes your primary work sector?

- Academic
- Government/Public sector
- Commercial
- Not-for-profit organisation
- Other

---

If you selected other, please specify.

---

Which term/s best describe the type of data you use?  
(Check all that apply)

- Public health data (e.g. disease surveillance, immunization records, public health reporting, vital statistics, registries)
- Health services data (e.g. clinical records, EHR/EMR, prescribing, diagnostics, laboratory, insurance, healthcare providers & institutions, public health agencies, professional associations, pharma, biotech, health technology)
- Research and academia data (e.g. research institutes & networks, universities registries, genomics, omics, clinical trials, biobanks)
- Environmental data (e.g. climate, meteorological, transport, pollution, energy, geospatial)
- Behavioural and socioeconomic data (e.g. wellness, fitness, internet, social media, self monitoring, wearables, sensors, apps, mobile, loyalty cards, store transactions, location tracking, financial, education)
- Health capabilities data (policy, analytical and technological e.g. principles, aims, tools, governance, ethics, visualization, integration, prediction, modelling, synthesis, insight, storage, curation, extraction, interoperability, protection)
- Information and communication technologies (ICT) industry data (e.g. standards organizations, ICT businesses, telecommunication, security, analytics, marketing)
- Individual and group data (e.g. citizens, consumers, patients, civil society, health agencies, regulators, ICT agencies, international organizations)
- Non-health data (e.g. migration data)
- Experimental (involving some degree of manipulation)
- Interviews
- Observational (no manipulation involved)
- Other

If you selected other, please specify.

---

Do you own or generate the data that you work with?

- Yes
- No

If some or all of your data are available to others, on which platforms are these data available and how much of it is made available? (Check all that apply)

- On my organization's website
- Through a regional network of researchers/ stakeholders
- Through a national network of researchers/ stakeholders
- Through a global network of researchers/ stakeholders
- Through a digital/ technical framework
- Informal sharing (e.g. email, file sharing/ storage services such as Dropbox, OneDrive, Google Drive, EMC, Azure and AWS)
- On my personal website or other social networks
- My data is not available at all
- On public repositories (e.g. GitHub)
- Other

If you selected other, please specify.

---

What kind of data protection steps have been taken into account when sharing the data?

---

What type of data use agreement is used when sharing the data to protect data ownership rights, and/or privacy/sensitivity of the data?

---

If your data are not available electronically to others, why not? (Check all that apply)

- Insufficient funds to make data available
  - Insufficient funds to keep data updated
  - Insufficient time to make data available and/or to keep it updated
  - Lack of frameworks that make it mandatory to share
  - No place to upload or place the data
  - Sponsor doesn't require it
  - Don't have the rights to make the data available
  - Other
- 

The following group of statements relates to how you collect and use research data. Tell us how much you agree with each statement:

|                                                                                                  | Disagree strongly     | Disagree somewhat     | Agree somewhat        | Agree strongly        | Not applicable        |
|--------------------------------------------------------------------------------------------------|-----------------------|-----------------------|-----------------------|-----------------------|-----------------------|
| I am satisfied with the process for managing my data                                             | <input type="radio"/> | <input type="radio"/> | <input type="radio"/> | <input type="radio"/> | <input type="radio"/> |
| I am satisfied with my institution's data management and/or governance plan                      | <input type="radio"/> | <input type="radio"/> | <input type="radio"/> | <input type="radio"/> | <input type="radio"/> |
| I am satisfied with the process for collecting my research data.                                 | <input type="radio"/> | <input type="radio"/> | <input type="radio"/> | <input type="radio"/> | <input type="radio"/> |
| I am satisfied with the process for searching for my own data.                                   | <input type="radio"/> | <input type="radio"/> | <input type="radio"/> | <input type="radio"/> | <input type="radio"/> |
| I am satisfied with the process for storing my data during the life of the project (short-term). | <input type="radio"/> | <input type="radio"/> | <input type="radio"/> | <input type="radio"/> | <input type="radio"/> |
| I am satisfied with the process for storing my data beyond the life of the project (long-term).  | <input type="radio"/> | <input type="radio"/> | <input type="radio"/> | <input type="radio"/> | <input type="radio"/> |
| I am satisfied with the process for analysing my data (by myself or through a biostatistician).  | <input type="radio"/> | <input type="radio"/> | <input type="radio"/> | <input type="radio"/> | <input type="radio"/> |
| I share my data with others.                                                                     | <input type="radio"/> | <input type="radio"/> | <input type="radio"/> | <input type="radio"/> | <input type="radio"/> |

|                                                               |                       |                       |                       |                       |                       |
|---------------------------------------------------------------|-----------------------|-----------------------|-----------------------|-----------------------|-----------------------|
| Others can access my data easily.                             | <input type="radio"/> | <input type="radio"/> | <input type="radio"/> | <input type="radio"/> | <input type="radio"/> |
| I am satisfied with the tools for preparing metadata.         | <input type="radio"/> | <input type="radio"/> | <input type="radio"/> | <input type="radio"/> | <input type="radio"/> |
| I am satisfied with the tools for preparing my documentation. | <input type="radio"/> | <input type="radio"/> | <input type="radio"/> | <input type="radio"/> | <input type="radio"/> |

The following group of statements relates to how your organisation is involved with your data. Tell us how much you agree with each statement:

|                                                                                                                                                | Disagree strongly     | Disagree somewhat     | Agree somewhat        | Agree strongly        | Not applicable        |
|------------------------------------------------------------------------------------------------------------------------------------------------|-----------------------|-----------------------|-----------------------|-----------------------|-----------------------|
| My organization or project has a formal established process for supporting data analysis during the life of the project (short-term).          | <input type="radio"/> | <input type="radio"/> | <input type="radio"/> | <input type="radio"/> | <input type="radio"/> |
| My organization or project has a formal established process for supporting data analysis beyond the life of the project (long-term).           | <input type="radio"/> | <input type="radio"/> | <input type="radio"/> | <input type="radio"/> | <input type="radio"/> |
| My organization or project has a formal established process for managing data during the life of the project (short-term).                     | <input type="radio"/> | <input type="radio"/> | <input type="radio"/> | <input type="radio"/> | <input type="radio"/> |
| My organization or project has a formal established process for storing data beyond the life of the project (long-term).                       | <input type="radio"/> | <input type="radio"/> | <input type="radio"/> | <input type="radio"/> | <input type="radio"/> |
| My organization or project provides the necessary tools and technical support for data management during the life of the project (short-term). | <input type="radio"/> | <input type="radio"/> | <input type="radio"/> | <input type="radio"/> | <input type="radio"/> |
| My organization or project provides the necessary tools and technical support for data management beyond the life of the project (long-term).  | <input type="radio"/> | <input type="radio"/> | <input type="radio"/> | <input type="radio"/> | <input type="radio"/> |
| My organization or project provides training on best practices for data management.                                                            | <input type="radio"/> | <input type="radio"/> | <input type="radio"/> | <input type="radio"/> | <input type="radio"/> |
| My organization or project provides the necessary funds to support data management during the life of a research project (short-term).         | <input type="radio"/> | <input type="radio"/> | <input type="radio"/> | <input type="radio"/> | <input type="radio"/> |

My organization or project provides the necessary funds to support data management beyond the life of the project (long-term).

The following group of statements relates to your views on the use of data across your research field. Tell us how much you agree with each statement.

|                                                                                                                                 | Disagree strongly     | Disagree somewhat     | Agree somewhat        | Agree strongly        | Not applicable        |
|---------------------------------------------------------------------------------------------------------------------------------|-----------------------|-----------------------|-----------------------|-----------------------|-----------------------|
| Lack of access to data generated by other researchers or institutions is a major impediment to progress in science.             | <input type="radio"/> | <input type="radio"/> | <input type="radio"/> | <input type="radio"/> | <input type="radio"/> |
| Lack of access to data generated by other researchers or institutions has restricted my ability to answer scientific questions. | <input type="radio"/> | <input type="radio"/> | <input type="radio"/> | <input type="radio"/> | <input type="radio"/> |
| Data may be used in other ways than initially intended.                                                                         | <input type="radio"/> | <input type="radio"/> | <input type="radio"/> | <input type="radio"/> | <input type="radio"/> |

The following group of statements relates to data sharing. Tell us how much you agree with each statement.

|                                                                                                          | Disagree strongly     | Disagree somewhat     | Agree somewhat        | Agree strongly        | Not applicable        |
|----------------------------------------------------------------------------------------------------------|-----------------------|-----------------------|-----------------------|-----------------------|-----------------------|
| I would be willing to place my data under embargo (restriction placed on data for limited period).       | <input type="radio"/> | <input type="radio"/> | <input type="radio"/> | <input type="radio"/> | <input type="radio"/> |
| I am satisfied with other researchers placing their data under embargo.                                  | <input type="radio"/> | <input type="radio"/> | <input type="radio"/> | <input type="radio"/> | <input type="radio"/> |
| I would be willing to equally reciprocate data sharing when data is shared with me.                      | <input type="radio"/> | <input type="radio"/> | <input type="radio"/> | <input type="radio"/> | <input type="radio"/> |
| I would use other researchers' datasets if their datasets were easily accessible.                        | <input type="radio"/> | <input type="radio"/> | <input type="radio"/> | <input type="radio"/> | <input type="radio"/> |
| I would be willing to place at least some of my data into a public data repository with no restrictions. | <input type="radio"/> | <input type="radio"/> | <input type="radio"/> | <input type="radio"/> | <input type="radio"/> |
| I would be willing to place all of my data into a public data repository with no restrictions.           | <input type="radio"/> | <input type="radio"/> | <input type="radio"/> | <input type="radio"/> | <input type="radio"/> |

|                                                                                                                         |                       |                       |                       |                       |                       |
|-------------------------------------------------------------------------------------------------------------------------|-----------------------|-----------------------|-----------------------|-----------------------|-----------------------|
| I would be more likely to make my data available if I could place privacy and ethical conditions on access .            | <input type="radio"/> | <input type="radio"/> | <input type="radio"/> | <input type="radio"/> | <input type="radio"/> |
| I would be more likely to make my data available if I could place conditions of governance and regulation on access     | <input type="radio"/> | <input type="radio"/> | <input type="radio"/> | <input type="radio"/> | <input type="radio"/> |
| I am satisfied with my ability to integrate data from disparate sources to address research questions.                  | <input type="radio"/> | <input type="radio"/> | <input type="radio"/> | <input type="radio"/> | <input type="radio"/> |
| I would be willing to share data across a broad group of researchers who use data in different ways.                    | <input type="radio"/> | <input type="radio"/> | <input type="radio"/> | <input type="radio"/> | <input type="radio"/> |
| It is important that my data are cited when used by other researchers.                                                  | <input type="radio"/> | <input type="radio"/> | <input type="radio"/> | <input type="radio"/> | <input type="radio"/> |
| It is appropriate to combine shared datasets from different researchers into one dataset and then publish that dataset. | <input type="radio"/> | <input type="radio"/> | <input type="radio"/> | <input type="radio"/> | <input type="radio"/> |

The following group of statements relates to conditions of fair exchange for the use of your data. Tell us how much you agree with each statement.

|                                                                                                                                                         | Disagree strongly     | Disagree somewhat     | Agree somewhat        | Agree strongly        | Not applicable        |
|---------------------------------------------------------------------------------------------------------------------------------------------------------|-----------------------|-----------------------|-----------------------|-----------------------|-----------------------|
| I am satisfied with exchanging my data knowing that secondary data will be retrieved from my original dataset and then allowing that data to be shared. | <input type="radio"/> | <input type="radio"/> | <input type="radio"/> | <input type="radio"/> | <input type="radio"/> |
| I am satisfied with exchanging my data if I know it will be used ethically.                                                                             | <input type="radio"/> | <input type="radio"/> | <input type="radio"/> | <input type="radio"/> | <input type="radio"/> |
| I am satisfied with exchanging my data for royalties.                                                                                                   | <input type="radio"/> | <input type="radio"/> | <input type="radio"/> | <input type="radio"/> | <input type="radio"/> |
| I am satisfied with exchanging my data for commercialisation purposes with profits.                                                                     | <input type="radio"/> | <input type="radio"/> | <input type="radio"/> | <input type="radio"/> | <input type="radio"/> |
| I am satisfied with exchanging my data for commercialisation purposes without profits.                                                                  | <input type="radio"/> | <input type="radio"/> | <input type="radio"/> | <input type="radio"/> | <input type="radio"/> |



|                                                                                                                                                                             |                       |                       |                       |                       |                       |
|-----------------------------------------------------------------------------------------------------------------------------------------------------------------------------|-----------------------|-----------------------|-----------------------|-----------------------|-----------------------|
| I am satisfied with exchanging my data for co-authorship on publications.                                                                                                   | <input type="radio"/> | <input type="radio"/> | <input type="radio"/> | <input type="radio"/> | <input type="radio"/> |
| I am satisfied with exchanging my data for formal acknowledgement in all disseminated work using that data.                                                                 | <input type="radio"/> | <input type="radio"/> | <input type="radio"/> | <input type="radio"/> | <input type="radio"/> |
| I am satisfied with exchanging my data for formal citation in all disseminated work using that data                                                                         | <input type="radio"/> | <input type="radio"/> | <input type="radio"/> | <input type="radio"/> | <input type="radio"/> |
| I am satisfied with exchanging my data for the opportunity to collaborate on the project.                                                                                   | <input type="radio"/> | <input type="radio"/> | <input type="radio"/> | <input type="radio"/> | <input type="radio"/> |
| I am satisfied with exchanging my data for the authority to approve/disapprove data disseminated in any format.                                                             | <input type="radio"/> | <input type="radio"/> | <input type="radio"/> | <input type="radio"/> | <input type="radio"/> |
| I am satisfied with exchanging my data for the recovery of a portion of the costs of data acquisition, retrieval or provision.                                              | <input type="radio"/> | <input type="radio"/> | <input type="radio"/> | <input type="radio"/> | <input type="radio"/> |
| I am satisfied with exchanging my data for the opportunity to review the results and make suggestions or comments on data that could not be disseminated.                   | <input type="radio"/> | <input type="radio"/> | <input type="radio"/> | <input type="radio"/> | <input type="radio"/> |
| I am satisfied with exchanging my data for the right to approve/disapprove reprints of articles and/or digital resharing of articles that make use of my data.              | <input type="radio"/> | <input type="radio"/> | <input type="radio"/> | <input type="radio"/> | <input type="radio"/> |
| I am satisfied with exchanging my data for a complete updated list of all products that make use of my data, including articles, presentations, educational materials, etc. | <input type="radio"/> | <input type="radio"/> | <input type="radio"/> | <input type="radio"/> | <input type="radio"/> |

---

The following group of statements relates to conditions of fair exchange for the use of other researchers' data. Tell us how much you agree with each statement.

|                                                                                                                                                  | Disagree strongly                | Disagree somewhat     | Agree somewhat        | Agree strongly        | Not applicable        |
|--------------------------------------------------------------------------------------------------------------------------------------------------|----------------------------------|-----------------------|-----------------------|-----------------------|-----------------------|
| I am satisfied with extracting secondary data from the primary data of other researchers' and then sharing that data.                            | <input checked="" type="radio"/> | <input type="radio"/> | <input type="radio"/> | <input type="radio"/> | <input type="radio"/> |
| I am satisfied with following ethical principles when using other researchers' data.                                                             | <input type="radio"/>            | <input type="radio"/> | <input type="radio"/> | <input type="radio"/> | <input type="radio"/> |
| I am satisfied with paying royalties to use other researchers' data.                                                                             | <input type="radio"/>            | <input type="radio"/> | <input type="radio"/> | <input type="radio"/> | <input type="radio"/> |
| I am satisfied with paying profits to other researchers' to commercialise their data.                                                            | <input type="radio"/>            | <input type="radio"/> | <input type="radio"/> | <input type="radio"/> | <input type="radio"/> |
| I am satisfied with commercializing other researchers' data without paying them profits.                                                         | <input type="radio"/>            | <input type="radio"/> | <input type="radio"/> | <input type="radio"/> | <input type="radio"/> |
| I am satisfied with offering co-authorship on publications in exchange of using other researchers' data.                                         | <input type="radio"/>            | <input type="radio"/> | <input type="radio"/> | <input type="radio"/> | <input type="radio"/> |
| I am satisfied with formally acknowledging other researchers' in all disseminated work using their data.                                         | <input type="radio"/>            | <input type="radio"/> | <input type="radio"/> | <input type="radio"/> | <input type="radio"/> |
| I am satisfied with formally citing other researchers' in all disseminated work using their data.                                                | <input type="radio"/>            | <input type="radio"/> | <input type="radio"/> | <input type="radio"/> | <input type="radio"/> |
| I am satisfied with offering other researchers' the opportunity to collaborate on the project when using their data.                             | <input type="radio"/>            | <input type="radio"/> | <input type="radio"/> | <input type="radio"/> | <input type="radio"/> |
| I am satisfied with offering other researchers' the authority to approve/disapprove data disseminated in any format when using their data.       | <input type="radio"/>            | <input type="radio"/> | <input type="radio"/> | <input type="radio"/> | <input type="radio"/> |
| I am satisfied with compensating a portion of the costs of data acquisition, retrieval or provision to other researchers' when using their data. | <input type="radio"/>            | <input type="radio"/> | <input type="radio"/> | <input type="radio"/> | <input type="radio"/> |

I am satisfied with offering other researchers' the opportunity to review the results and make suggestions or comments on any of their data that could not be disseminated.

I am satisfied with offering other researchers' the right to approve/disapprove article reprints and/or digital resharing of articles that use their data.

I am satisfied with offering other researchers' a complete updated list of all products that make use of their data, including articles, presentations, educational materials, etc.

---

Please share any additional comments, concerns, questions, or suggestions about your use of data?

---
